# Supplementary material for: Comparative Analysis of rRNA Removal Methods for RNA-Seq Differential Expression in Halophilic Archaea
Source: MDPI journal article supplement (doi:10.3390/biom12050682), 2022-05-10
Supplement: s1 [file s1]

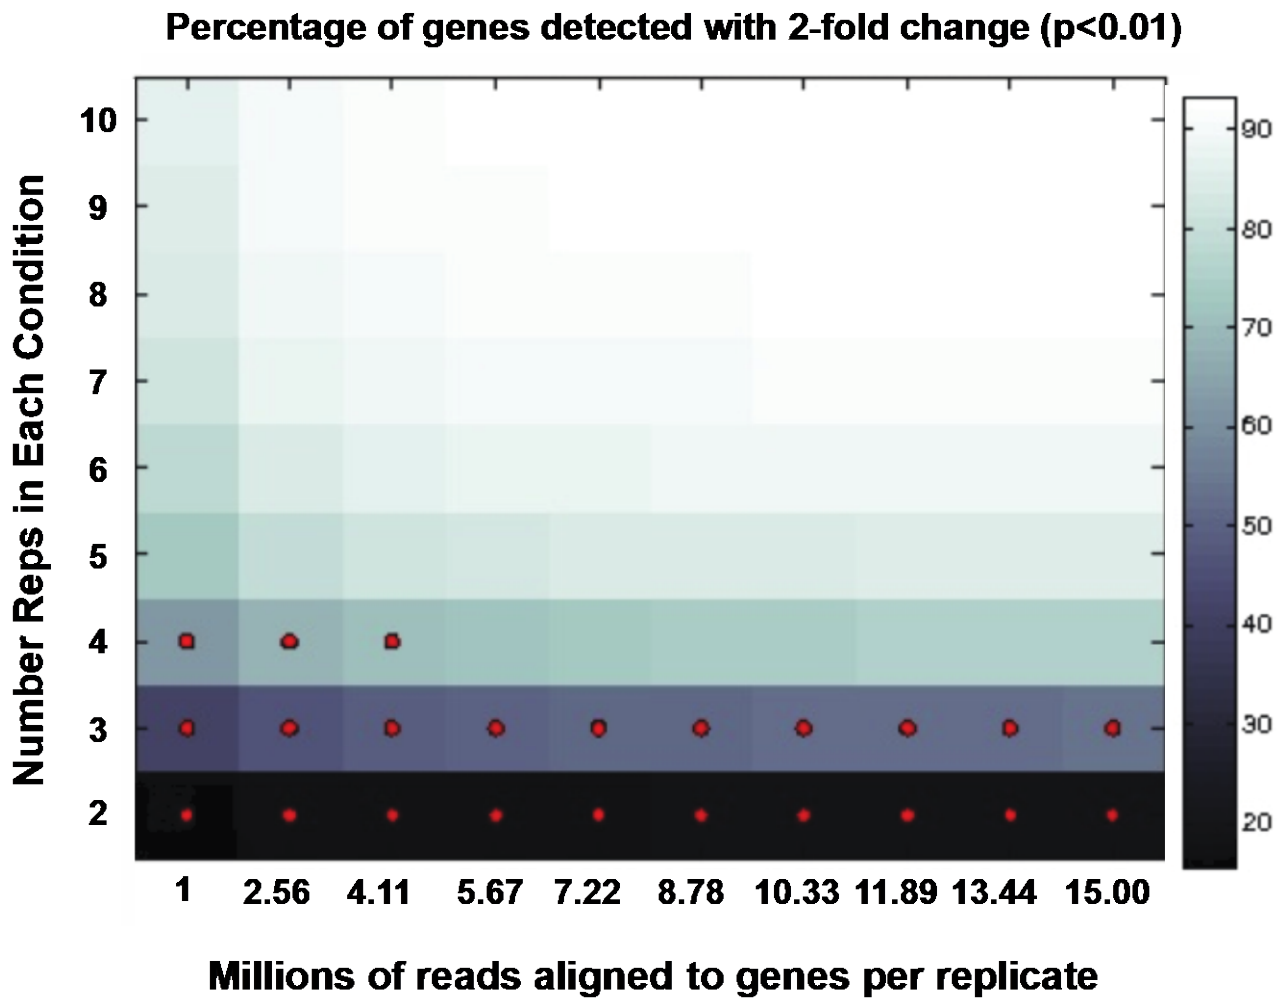

**Figure S1.** - Analysis of sequencing depth, number of biological replicates, and detection of differentially expressed genes (2-fold differential expression) using the online tool Scotty. For Scotty access instructions, please see [https://github.com/amyschmid/rRNA\\_analysis/blob/main/scotty-access-instructions](https://github.com/amyschmid/rRNA_analysis/blob/main/scotty-access-instructions) Squares with red dots are predicted to have <75% detection of differentially expressed genes.
